# Supplementary material for: Voluntary Exercise Prevents Cisplatin-Induced Muscle Wasting during Chemotherapy in Mice
Source: PubMed Central journal article supplement (PMC4182656; doi:10.1371/journal.pone.0109030), 2014-09-30

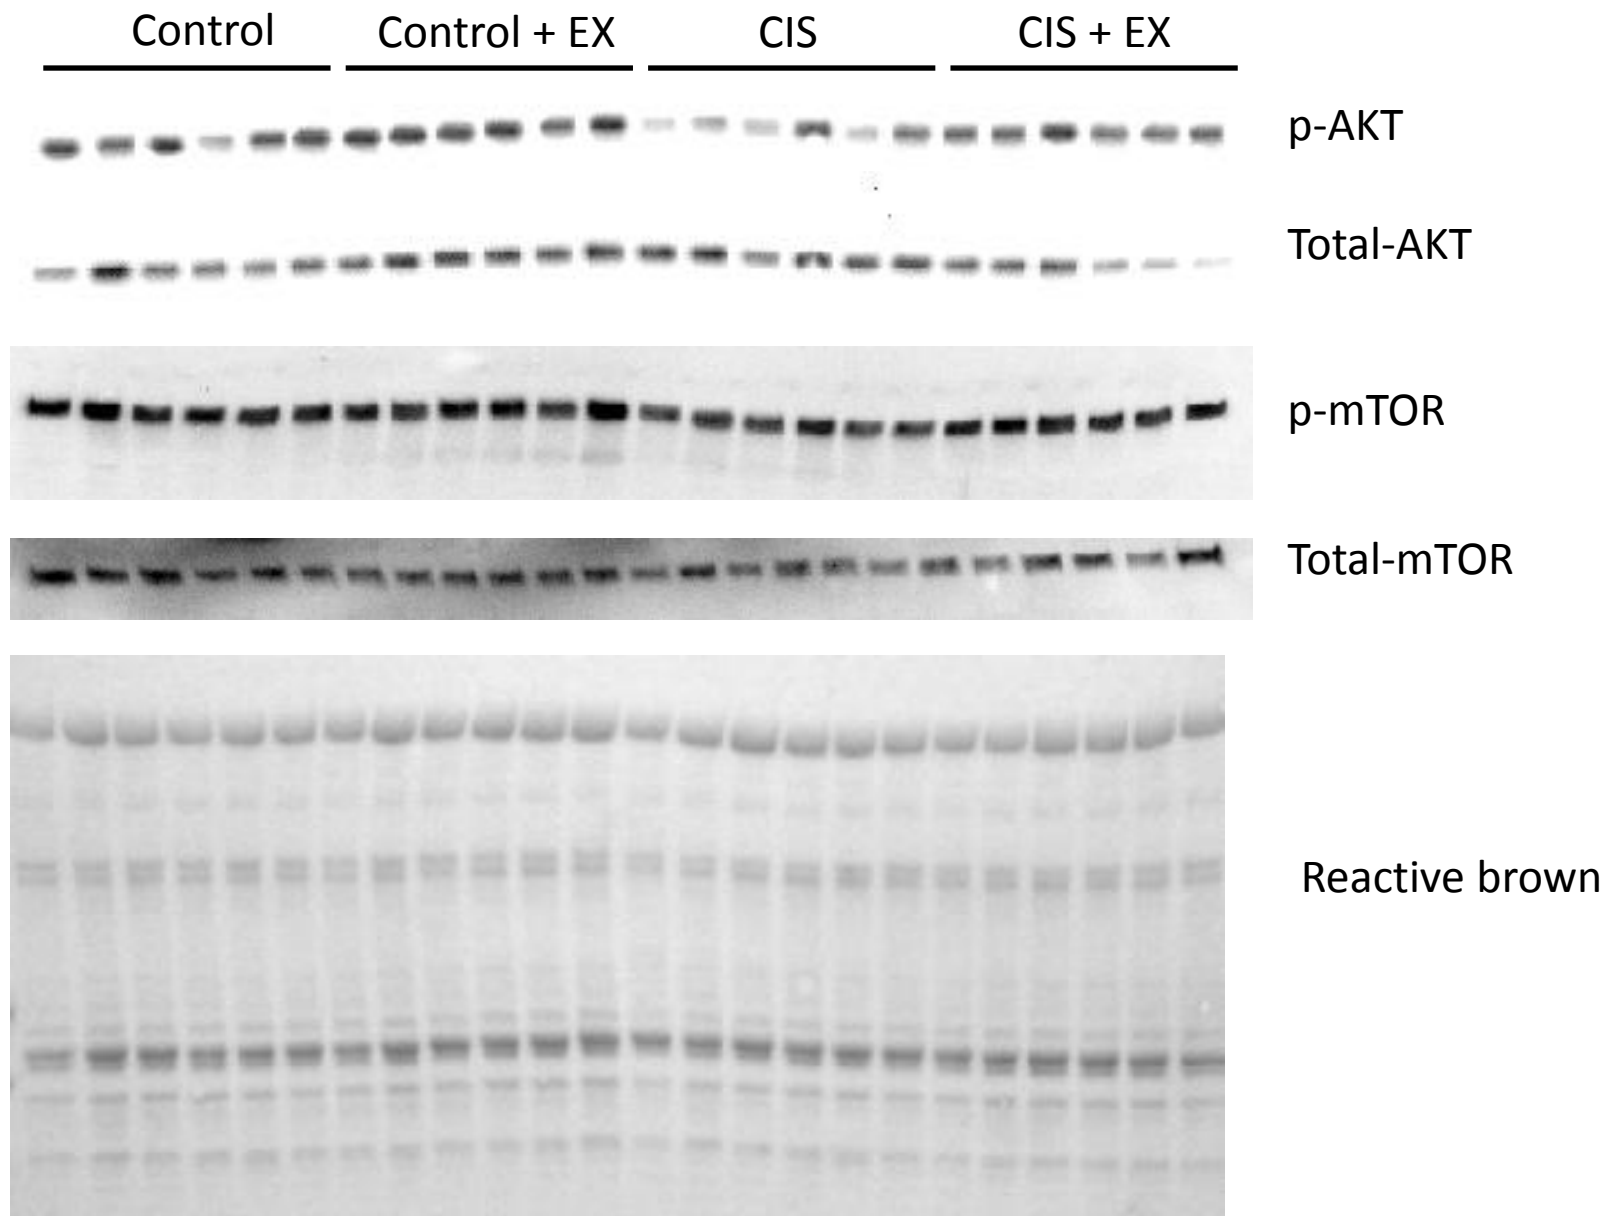

Supplement: pone.0109030.s002.pdf [file pone.0109030.s002.pdf]
